# Supplementary material
Source: MDPI journal article supplement (https://www.mdpi.com/2227-9040/11/1/67)
Supplement: s1 [file s1]

**Table S3.** Mean gene expression and standard deviation for respective gene in all cell lines and SOM groups.

| Assay         | MLS 2645-94 |      | MLS 1765-92 |      | MLS 402-91 |      | SK-N-MC  |      | TC-71    |      | SOM 1    |      | SOM 2    |      | SOM 3    |      | SOM 4    |      | SOM 5    |      |
|---------------|-------------|------|-------------|------|------------|------|----------|------|----------|------|----------|------|----------|------|----------|------|----------|------|----------|------|
|               | (n = 76)    |      | (n = 59)    |      | (n = 84)   |      | (n = 60) |      | (n = 74) |      | (n = 76) |      | (n = 87) |      | (n = 73) |      | (n = 64) |      | (n = 53) |      |
|               | Mean        | SD   | Mean        | SD   | Mean       | SD   | Mean     | SD   | Mean     | SD   | Mean     | SD   | Mean     | SD   | Mean     | SD   | Mean     | SD   | Mean     | SD   |
| <i>APAF1</i>  | 1.42        | 2.59 | 0.87        | 2.10 | 1.83       | 2.72 | 0.12     | 1.70 | 1.13     | 1.97 | 2.89     | 2.64 | 1.09     | 2.25 | 1.17     | 1.99 | 0.53     | 1.84 | -0.55    | 1.17 |
| <i>ATM</i>    | 1.61        | 3.10 | 2.57        | 2.29 | 4.44       | 4.31 | 0.08     | 2.03 | 1.37     | 2.39 | 4.93     | 3.54 | 2.87     | 3.42 | 1.38     | 2.52 | 0.79     | 2.27 | -0.43    | 1.52 |
| <i>ATR</i>    | 1.75        | 2.99 | 1.10        | 2.27 | 1.96       | 3.17 | 0.29     | 2.04 | 1.30     | 2.38 | 3.42     | 2.95 | 1.15     | 2.56 | 1.57     | 2.45 | 0.56     | 2.10 | -0.62    | 1.19 |
| <i>BBC3</i>   | 0.12        | 2.11 | -0.50       | 1.10 | 0.44       | 2.34 | -0.55    | 1.27 | 0.72     | 2.16 | 0.84     | 2.56 | -0.16    | 1.68 | 0.58     | 2.15 | -0.22    | 1.63 | -0.78    | 0.81 |
| <i>BCL2L1</i> | 5.56        | 2.44 | 6.13        | 1.66 | 7.03       | 1.90 | 1.91     | 2.50 | 3.71     | 2.14 | 7.41     | 1.19 | 6.66     | 1.10 | 4.35     | 2.11 | 3.48     | 2.43 | 1.53     | 2.62 |
| <i>BID</i>    | 6.99        | 1.57 | 6.25        | 1.97 | 7.93       | 1.37 | 5.61     | 1.66 | 6.05     | 1.33 | 8.36     | 0.81 | 7.21     | 0.91 | 6.51     | 0.72 | 5.81     | 1.49 | 4.54     | 2.31 |
| <i>CASP3</i>  | 4.07        | 3.07 | 4.56        | 2.43 | 5.06       | 2.62 | 1.26     | 2.61 | 3.07     | 2.52 | 5.93     | 1.90 | 4.66     | 2.54 | 3.53     | 2.51 | 2.76     | 2.57 | 0.31     | 2.24 |
| <i>CCNA2</i>  | 4.41        | 2.46 | 3.16        | 2.14 | 3.59       | 2.74 | 1.56     | 2.32 | 3.68     | 2.04 | 5.73     | 1.61 | 2.93     | 2.24 | 4.11     | 1.75 | 2.54     | 2.12 | 0.67     | 2.06 |
| <i>CCNB2</i>  | 5.58        | 2.67 | 4.48        | 2.51 | 4.88       | 3.34 | 1.08     | 2.95 | 3.74     | 2.27 | 6.17     | 2.98 | 4.43     | 2.73 | 4.98     | 1.93 | 2.97     | 2.82 | 0.61     | 2.38 |
| <i>CCND1</i>  | 2.60        | 3.49 | 0.60        | 2.17 | 5.63       | 2.48 | 6.80     | 2.46 | 7.61     | 2.13 | 5.60     | 3.00 | 2.59     | 3.29 | 6.18     | 3.37 | 6.06     | 3.10 | 3.53     | 4.05 |
| <i>CCNG1</i>  | 5.04        | 1.80 | 3.54        | 2.32 | 5.11       | 2.15 | 2.59     | 2.44 | 4.20     | 1.88 | 5.84     | 1.75 | 4.61     | 1.69 | 4.76     | 1.17 | 3.52     | 2.06 | 1.33     | 2.41 |
| <i>CDC25A</i> | 2.80        | 2.58 | 1.95        | 2.17 | 3.86       | 2.55 | 0.28     | 2.03 | 1.27     | 2.22 | 3.87     | 2.52 | 3.49     | 2.20 | 1.93     | 2.13 | 0.76     | 2.17 | -0.46    | 1.22 |
| <i>CDC25B</i> | 5.50        | 2.36 | 5.34        | 2.24 | 6.37       | 1.93 | 3.07     | 2.93 | 4.47     | 2.39 | 6.92     | 1.95 | 5.85     | 1.33 | 5.71     | 1.07 | 3.65     | 2.56 | 1.84     | 2.82 |
| <i>CDC25C</i> | 2.80        | 3.17 | 3.00        | 2.35 | 2.38       | 3.57 | -0.25    | 1.69 | 1.76     | 2.51 | 4.16     | 3.20 | 2.05     | 2.76 | 2.56     | 2.57 | 0.75     | 2.41 | -0.49    | 1.48 |
| <i>CDC45</i>  | 3.28        | 3.21 | 2.47        | 2.62 | 4.57       | 2.80 | 0.47     | 2.40 | 2.95     | 2.61 | 5.48     | 2.09 | 3.60     | 2.63 | 3.58     | 2.43 | 0.51     | 2.24 | 0.03     | 2.05 |
| <i>CDK1</i>   | 4.56        | 2.78 | 2.68        | 2.28 | 5.29       | 2.78 | 1.12     | 2.56 | 2.93     | 2.72 | 6.74     | 1.79 | 3.79     | 2.03 | 3.91     | 2.47 | 1.15     | 2.16 | 0.60     | 2.27 |
| <i>CDK4</i>   | 7.37        | 1.20 | 5.23        | 1.88 | 7.99       | 1.12 | 4.77     | 2.06 | 6.07     | 1.61 | 8.34     | 0.88 | 6.90     | 1.12 | 6.74     | 0.73 | 5.71     | 1.06 | 3.45     | 2.43 |
| <i>CDK6</i>   | 2.56        | 3.00 | 2.02        | 2.21 | 4.30       | 2.70 | -0.54    | 1.29 | -0.65    | 1.03 | 4.37     | 2.59 | 3.34     | 2.54 | 0.04     | 1.99 | -0.14    | 1.72 | -0.45    | 1.47 |
| <i>CDKN1A</i> | 3.64        | 3.13 | 2.37        | 2.87 | 4.21       | 3.38 | -0.14    | 1.90 | 0.70     | 2.22 | 4.84     | 3.02 | 3.72     | 2.93 | 1.30     | 2.61 | 0.72     | 2.38 | -0.36    | 1.85 |
| <i>CDKN1B</i> | 2.13        | 3.00 | 2.45        | 2.54 | 2.79       | 2.99 | 0.43     | 2.28 | 3.46     | 2.72 | 4.18     | 2.58 | 1.87     | 2.72 | 3.62     | 2.54 | 1.32     | 2.60 | -0.10    | 1.81 |
| <i>CDKN2C</i> | 4.53        | 2.84 | 3.71        | 2.03 | 3.30       | 3.21 | 2.69     | 2.78 | 4.28     | 2.00 | 5.33     | 2.65 | 3.27     | 2.57 | 4.47     | 2.27 | 3.04     | 2.42 | 2.03     | 2.51 |
| <i>CDKN2D</i> | 1.91        | 2.40 | 1.34        | 1.82 | 1.53       | 2.41 | 0.12     | 1.61 | 1.60     | 1.91 | 3.12     | 2.15 | 1.00     | 2.02 | 1.74     | 1.85 | 0.63     | 1.67 | -0.24    | 1.40 |
| <i>DBF4</i>   | 3.89        | 2.17 | 1.91        | 2.13 | 3.26       | 2.56 | 1.39     | 2.35 | 2.29     | 2.15 | 4.70     | 2.05 | 2.47     | 2.16 | 3.13     | 1.94 | 1.97     | 1.89 | 0.17     | 1.94 |
| <i>E2F1</i>   | 3.91        | 3.04 | 3.59        | 2.19 | 6.26       | 2.74 | 1.47     | 2.76 | 2.85     | 2.42 | 5.98     | 2.51 | 5.56     | 2.13 | 2.87     | 2.70 | 2.27     | 2.46 | 0.77     | 2.31 |
| <i>E2F4</i>   | 5.17        | 2.70 | 4.99        | 1.75 | 5.90       | 2.12 | 1.63     | 2.49 | 2.84     | 2.44 | 6.81     | 1.23 | 5.44     | 1.45 | 4.17     | 1.93 | 2.46     | 2.53 | 0.70     | 2.47 |
| <i>EGFR</i>   | -1.00       | 0.00 | 0.51        | 2.01 | -1.00      | 0.00 | -1.00    | 0.00 | -1.00    | 0.00 | -0.91    | 0.56 | -0.23    | 1.65 | -1.00    | 0.00 | -0.77    | 0.92 | -1.00    | 0.00 |
| <i>EWSR1</i>  | 7.14        | 1.95 | 5.37        | 2.25 | 7.40       | 1.88 | 4.34     | 2.34 | 6.22     | 1.82 | 8.13     | 1.12 | 6.71     | 1.47 | 6.84     | 0.96 | 5.51     | 1.37 | 2.79     | 2.87 |
| <i>FAS</i>    | 0.54        | 2.57 | -1.00       | 0.00 | -0.85      | 0.97 | -1.00    | 0.00 | -1.00    | 0.00 | -0.04    | 2.27 | -0.67    | 1.21 | -0.61    | 1.45 | -1.00    | 0.00 | -1.00    | 0.00 |
| <i>GAPDH</i>  | 11.83       | 1.09 | 10.94       | 1.14 | 12.30      | 1.06 | 9.83     | 1.40 | 10.63    | 0.96 | 12.73    | 0.69 | 11.76    | 0.56 | 11.15    | 0.56 | 10.57    | 0.56 | 8.93     | 1.41 |
| <i>H2AC6</i>  | 5.89        | 3.03 | 4.18        | 3.02 | 5.66       | 2.93 | 4.45     | 2.44 | 6.26     | 2.47 | 7.01     | 2.71 | 5.15     | 2.81 | 6.17     | 2.41 | 4.60     | 2.39 | 3.29     | 2.84 |
| <i>CHEK1</i>  | 1.84        | 3.15 | 2.48        | 2.84 | 3.22       | 3.30 | 0.99     | 2.58 | 1.95     | 2.70 | 3.50     | 3.16 | 2.88     | 3.04 | 2.18     | 2.80 | 1.41     | 2.61 | -0.13    | 1.97 |
| <i>CHEK2</i>  | 2.33        | 2.66 | 1.02        | 1.99 | 0.96       | 2.55 | 0.56     | 1.94 | 2.81     | 2.21 | 2.65     | 2.76 | 1.08     | 2.29 | 2.90     | 2.16 | 0.85     | 1.96 | -0.04    | 1.58 |
| <i>IL6ST</i>  | 5.26        | 1.83 | 3.57        | 2.20 | 4.98       | 2.27 | 0.27     | 2.02 | 0.06     | 1.79 | 5.71     | 1.91 | 4.78     | 1.78 | 1.60     | 2.66 | 1.16     | 2.39 | 0.15     | 2.02 |
| <i>JAK1</i>   | 4.12        | 2.24 | 3.62        | 1.69 | 4.66       | 2.02 | 4.33     | 2.09 | 5.90     | 1.75 | 5.73     | 1.37 | 4.18     | 1.52 | 5.57     | 1.34 | 4.62     | 2.25 | 2.14     | 2.30 |
| <i>JAK2</i>   | 0.22        | 2.04 | -0.11       | 1.47 | -0.07      | 1.71 | -0.12    | 1.54 | -0.33    | 1.34 | 0.58     | 2.15 | -0.24    | 1.47 | -0.10    | 1.64 | -0.17    | 1.45 | -0.59    | 1.03 |
| <i>LIFR</i>   | 0.47        | 1.99 | 0.42        | 1.91 | 1.35       | 2.33 | 0.17     | 1.75 | 1.20     | 2.03 | 1.92     | 2.26 | 0.60     | 2.06 | 1.22     | 2.01 | 0.16     | 1.65 | -0.44    | 1.32 |
| <i>PIDD1</i>  | 0.34        | 2.41 | -0.34       | 1.43 | 0.74       | 2.74 | -0.32    | 1.59 | 0.28     | 1.78 | 1.50     | 2.88 | 0.04     | 2.06 | 0.12     | 1.79 | -0.27    | 1.50 | -0.74    | 1.13 |
| <i>MCM10</i>  | 3.66        | 3.04 | 1.89        | 2.32 | 3.73       | 3.18 | -0.34    | 1.51 | 1.29     | 2.36 | 4.05     | 3.02 | 3.89     | 2.53 | 2.00     | 2.41 | 0.15     | 2.11 | -0.44    | 1.48 |
| <i>MCM2</i>   | 5.64        | 2.84 | 4.58        | 2.41 | 7.02       | 2.50 | 4.17     | 2.66 | 5.03     | 2.04 | 7.43     | 1.32 | 6.56     | 1.79 | 5.28     | 1.88 | 4.61     | 2.03 | 1.80     | 2.99 |
| <i>MCM4</i>   | 4.71        | 2.13 | 4.52        | 1.69 | 6.13       | 2.06 | 3.47     | 2.58 | 3.91     | 2.10 | 5.98     | 1.87 | 5.90     | 1.07 | 4.62     | 1.65 | 3.49     | 2.31 | 2.03     | 2.26 |
| <i>MCM5</i>   | 6.07        | 2.54 | 3.92        | 2.73 | 6.73       | 2.48 | 2.74     | 2.86 | 4.20     | 2.31 | 6.64     | 2.58 | 6.57     | 1.58 | 4.87     | 1.91 | 3.42     | 2.70 | 1.56     | 2.85 |
| <i>MCM6</i>   | 3.06        | 2.57 | 1.56        | 1.84 | 4.04       | 2.89 | 1.41     | 2.44 | 2.91     | 2.09 | 3.87     | 2.76 | 3.72     | 2.37 | 2.86     | 2.11 | 1.99     | 2.12 | 0.18     | 1.81 |
| <i>MCM7</i>   | 7.75        | 1.92 | 6.44        | 2.00 | 8.28       | 1.83 | 5.04     | 2.32 | 6.50     | 1.80 | 8.75     | 0.96 | 7.85     | 1.33 | 7.25     | 0.70 | 6.21     | 1.29 | 3.28     | 2.60 |
| <i>MCM8</i>   | 3.78        | 2.69 | 3.48        | 2.35 | 4.74       | 2.45 | 1.41     | 2.50 | 2.55     | 2.15 | 5.82     | 1.43 | 4.19     | 1.88 | 3.19     | 2.04 | 1.73     | 2.28 | 0.25     | 2.10 |
| <i>MCM9</i>   | 0.50        | 2.60 | 0.65        | 2.12 | 0.91       | 2.85 | -0.43    | 1.61 | -0.22    | 1.58 | 1.45     | 3.02 | 0.72     | 2.41 | -0.14    | 1.74 | -0.11    | 1.91 | -0.86    | 0.72 |
| <i>MDM2</i>   | 2.86        | 2.71 | 1.94        | 2.21 | 3.41       | 2.76 | 1.04     | 2.28 | 1.98     | 2.15 | 4.41     | 2.18 | 2.66     | 2.33 | 2.58     | 2.15 | 1.13     | 2.17 | 0.00     | 1.81 |
| <i>MDM4</i>   | 1.12        | 2.86 | 0.54        | 2.20 | 1.48       | 3.04 | 1.04     | 2.44 | 1.20     | 2.31 | 2.75     | 3.10 | 0.42     | 2.29 | 1.29     | 2.44 | 0.74     | 2.23 | 0.12     | 2.02 |

|                | MLS 2645-94 | MLS 1765-92 | MLS 402-91 | SK-N-MC    | TC-71      | SOM 1      | SOM 2      | SOM 3      | SOM 4      | SOM 5      |
|----------------|-------------|-------------|------------|------------|------------|------------|------------|------------|------------|------------|
| Assay          | (n = 76)    | (n = 59)    | (n = 84)   | (n = 60)   | (n = 74)   | (n = 76)   | (n = 87)   | (n = 73)   | (n = 64)   | (n = 53)   |
|                | Mean SD     | Mean SD     | Mean SD    | Mean SD    | Mean SD    | Mean SD    | Mean SD    | Mean SD    | Mean SD    | Mean SD    |
| <i>MKI67</i>   | 6.59 3.53   | 5.08 3.33   | 5.58 4.25  | 0.72 3.02  | 4.53 3.45  | 8.24 2.17  | 4.72 3.80  | 5.83 2.84  | 2.59 3.64  | 0.39 2.93  |
| <i>MYC</i>     | 4.65 2.55   | 1.68 2.29   | 4.13 2.53  | 3.57 2.17  | 5.24 2.06  | 4.87 2.12  | 3.44 2.68  | 5.29 1.89  | 4.01 2.14  | 1.68 2.74  |
| <i>ORC2</i>    | 3.39 2.55   | 1.98 2.10   | 2.93 2.83  | 1.16 2.13  | 2.52 2.02  | 4.20 2.30  | 2.50 2.37  | 3.22 1.80  | 1.52 2.07  | 0.14 1.83  |
| <i>ORC5</i>    | 2.28 2.54   | 0.73 1.73   | 2.08 2.42  | 0.51 1.78  | 0.64 1.67  | 3.10 2.23  | 1.66 2.18  | 1.24 1.79  | -0.03 1.50 | -0.01 1.54 |
| <i>PCNA</i>    | 7.57 1.81   | 6.53 1.71   | 7.96 1.46  | 3.77 3.02  | 5.55 2.07  | 8.11 1.34  | 7.94 0.95  | 6.33 1.58  | 5.39 1.86  | 2.88 2.98  |
| <i>PERP</i>    | 2.22 3.24   | 2.71 2.77   | 1.02 2.98  | 1.02 2.49  | 3.85 2.20  | 2.50 3.32  | 1.93 2.98  | 3.33 2.55  | 2.32 2.77  | 0.22 2.20  |
| <i>PIAS2</i>   | 1.20 2.76   | 1.19 2.43   | 1.23 2.94  | 0.62 2.23  | 1.60 2.38  | 1.89 3.05  | 1.16 2.59  | 1.85 2.47  | 0.67 2.25  | -0.05 1.81 |
| <i>PIGS</i>    | 3.41 2.94   | 2.79 2.57   | 4.10 3.03  | 0.15 2.12  | 1.02 2.23  | 5.13 2.15  | 3.30 2.71  | 2.13 2.55  | 0.89 2.39  | -0.69 1.30 |
| <i>PLK1</i>    | 2.99 3.64   | 2.71 2.74   | 2.72 3.62  | 0.75 2.47  | 2.63 2.76  | 5.01 3.25  | 1.26 2.82  | 3.27 2.87  | 1.94 2.51  | 0.05 1.89  |
| <i>PPM1D</i>   | 1.59 2.65   | 2.40 2.20   | 1.93 2.70  | -0.16 1.57 | 1.38 2.18  | 2.90 2.53  | 2.03 2.46  | 1.55 2.19  | 0.44 1.90  | -0.42 1.50 |
| <i>RB1</i>     | 5.24 2.19   | 4.46 2.03   | 6.13 2.22  | 2.10 2.41  | 3.49 2.43  | 6.86 1.03  | 5.58 1.42  | 4.34 1.92  | 2.82 2.40  | 1.06 2.18  |
| <i>RBL1</i>    | 0.53 2.20   | 0.04 1.64   | 1.88 2.47  | -1.00 0.00 | -0.52 1.12 | 2.16 2.33  | 0.61 2.19  | -0.35 1.43 | -0.73 0.96 | -0.82 0.76 |
| <i>RCHY1</i>   | 2.57 2.66   | 1.42 2.20   | 1.46 2.76  | 1.86 2.24  | 3.77 2.01  | 2.37 2.87  | 1.77 2.61  | 3.54 2.02  | 2.59 2.14  | 0.65 2.14  |
| <i>RPS10</i>   | 8.18 1.50   | 7.28 1.16   | 8.40 1.43  | 6.62 1.41  | 7.06 1.01  | 9.00 0.72  | 7.91 1.17  | 7.54 0.67  | 6.91 0.96  | 5.88 1.87  |
| <i>RRM2B</i>   | 1.69 2.76   | 1.93 2.21   | 2.28 2.90  | 0.23 1.98  | 2.00 2.34  | 3.25 2.60  | 1.95 2.47  | 1.84 2.37  | 1.32 2.38  | -0.74 0.93 |
| <i>SESN1</i>   | 0.01 2.01   | 0.07 1.77   | 0.23 2.17  | -0.16 1.63 | 0.78 2.29  | 0.32 2.29  | 0.39 2.12  | 0.77 2.21  | -0.16 1.66 | -0.62 1.22 |
| <i>SHISA5</i>  | 1.81 3.24   | 3.67 2.28   | 3.43 3.34  | -0.51 1.40 | 0.88 2.35  | 3.83 3.25  | 3.04 2.89  | 1.37 2.68  | 0.62 2.43  | -0.36 1.69 |
| <i>SKP2</i>    | 5.54 2.63   | 5.25 1.90   | 6.75 2.21  | 3.08 2.40  | 4.10 2.33  | 7.13 1.99  | 6.14 1.45  | 4.99 1.97  | 3.95 2.01  | 1.76 2.54  |
| <i>SOCS4</i>   | -0.78 0.97  | -0.96 0.34  | -0.50 1.23 | -0.92 0.45 | -0.97 0.25 | -0.31 1.46 | -1.00 0.00 | -0.91 0.52 | -0.96 0.30 | -0.87 0.68 |
| <i>STAT1</i>   | 5.14 2.30   | 4.73 2.05   | 6.26 2.02  | 1.42 2.39  | 4.69 1.88  | 6.80 1.63  | 5.61 1.28  | 5.00 1.48  | 3.66 2.00  | 0.44 2.19  |
| <i>STAT2</i>   | 2.14 3.07   | 1.53 2.47   | 4.67 2.85  | -0.06 1.86 | 2.06 2.45  | 5.07 2.47  | 2.84 2.82  | 2.07 2.55  | 0.67 2.15  | -0.60 1.32 |
| <i>STAT3</i>   | 4.17 2.76   | 5.16 1.85   | 5.24 2.22  | 1.93 2.38  | 2.29 2.38  | 5.97 1.62  | 5.13 1.86  | 3.18 2.38  | 2.50 2.35  | 1.03 2.37  |
| <i>TAF15</i>   | 0.58 1.99   | 0.04 1.51   | 1.49 2.28  | -0.08 1.58 | 0.01 1.53  | 1.87 2.14  | 0.57 1.88  | 0.37 1.80  | -0.33 1.31 | -0.57 1.18 |
| <i>TFDP1</i>   | -0.91 0.42  | 2.95 3.41   | -0.92 0.47 | 0.67 2.15  | -0.96 0.24 | -0.58 1.40 | 0.92 3.25  | -0.77 0.94 | 0.19 2.16  | 0.10 1.78  |
| <i>TFDP2</i>   | 1.38 2.73   | -0.05 1.66  | 2.08 3.02  | 0.75 2.22  | 0.58 2.05  | 2.98 2.80  | 0.90 2.46  | 0.77 2.23  | 0.17 1.88  | -0.14 1.75 |
| <i>TP53BP2</i> | 3.59 3.49   | 1.51 2.40   | 3.86 3.50  | 1.26 2.56  | 1.39 2.34  | 5.20 2.81  | 2.76 3.08  | 2.09 2.76  | 0.97 2.33  | 0.29 2.25  |
| <i>VIM</i>     | 10.98 1.19  | 8.05 1.36   | 10.10 1.71 | 3.66 2.74  | 8.28 1.48  | 11.00 1.19 | 9.62 1.22  | 8.94 1.60  | 7.21 2.41  | 3.86 3.19  |
| <i>YWHAZ</i>   | -0.09 1.85  | 0.33 1.62   | 0.74 2.05  | 0.67 1.70  | 0.50 1.67  | 1.06 2.23  | 0.29 1.76  | 0.57 1.72  | 0.37 1.62  | -0.35 1.27 |
| <i>ZMAT3</i>   | -0.18 2.03  | 0.42 2.13   | 0.50 2.63  | 0.55 2.42  | 0.78 2.30  | 1.01 2.87  | 0.14 2.12  | 0.63 2.26  | 0.34 2.20  | -0.24 1.85 |
| Mean           | 3.41 2.46   | 2.78 2.08   | 3.86 2.47  | 1.49 2.06  | 2.70 1.99  | 4.64 2.19  | 3.34 2.11  | 3.09 1.96  | 2.05 2.02  | 0.70 1.89  |

All data are in log2-scale.
