# Supplementary material
Source: MDPI journal article supplement (https://www.mdpi.com/2227-9040/11/1/67)
Supplement: s1 [file s1]

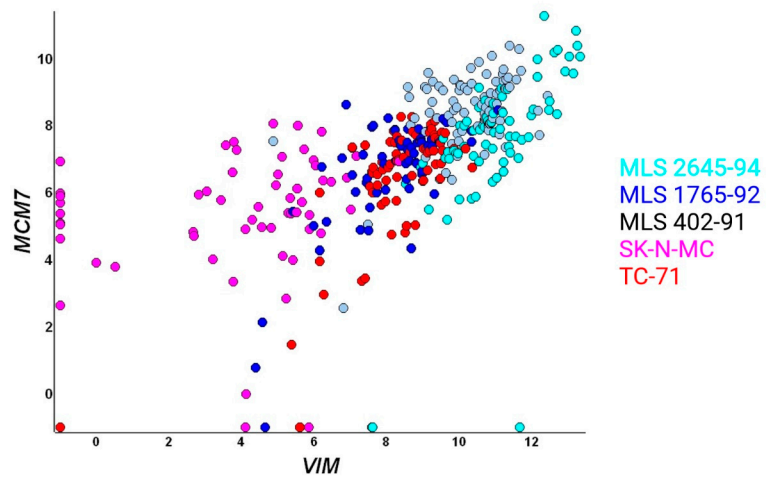

**Figure S1.** Scatter plot showing the expression of *VIM* and *MCM7* in MLS 2645-94, MLS 1765-92, MLS 402-91, SK-N-MC and TC-71 cells. Data are shown in log2-scale.
